# Supplementary material for: Growth kinetics of single-walled carbon nanotubes with a (2n, n) chirality selection
Source: PubMed Central journal article supplement — Sci Adv. 2019 Dec 13;5(12):eaav9668. doi: 10.1126/sciadv.aav9668 (PMC6910834; doi:10.1126/sciadv.aav9668), 2019-12-13
Supplement: aav9668_SM.pdf [file aav9668_SM.pdf]

## Supplementary Materials for

### Growth kinetics of single-walled carbon nanotubes with a $(2n, n)$ chirality selection

Maoshuai He\*, Xiao Wang, Shuchen Zhang, Hua Jiang, Filippo Cavalca, Hongzhi Cui, Jakob B. Wagner, Thomas W. Hansen, Esko Kauppinen, Jin Zhang\*, Feng Ding\*

\*Corresponding author. Email: [hemaoshuai@qust.edu.cn](mailto:hemaoshuai@qust.edu.cn) (M.H.); [jinzhang@pku.edu.cn](mailto:jinzhang@pku.edu.cn) (J.Z.); [gniding@gmail.com](mailto:gniding@gmail.com) (F.D.)

Published 13 December 2019, *Sci. Adv.* **5**, eaav9668 (2019)  
DOI: 10.1126/sciadv.aav9668

#### The PDF file includes:

- Fig. S1. Model of SWCNT growth following a screw dislocation theory.
- Fig. S2. Investigated SWCNTs (marked with arrows) and calculated growth rates.
- Fig. S3. SWCNT growth rate plots against tube diameter and catalyst size.
- Fig. S4. SEM images of carbon nanotubes grown on quartz-supported Co catalyst.
- Fig. S5. Chirality distribution histograms of SWCNTs grown on Co particles with different CO fluxes.
- Fig. S6. Chirality evolution and distribution of SWCNTs grown on Mo<sub>2</sub>C.
- Table S1. Growth rates and corresponding parameters of SWCNTs and catalysts for 16 different SWCNTs.
- Table S2.  $(n, m)$  populations of SWCNTs grown on Co catalyst using different flow rates of CO.
- Table S3. Chirality distribution of SWCNTs grown on Mo<sub>2</sub>C using different ratios of ethanol and H<sub>2</sub>.

#### Other Supplementary Material for this manuscript includes the following:

(available at [advances.sciencemag.org/cgi/content/full/5/12/eaav9668/DC1](https://advances.sciencemag.org/cgi/content/full/5/12/eaav9668/DC1))

Movie S1 (.mp4 format). In situ observation of SWCNT growth.

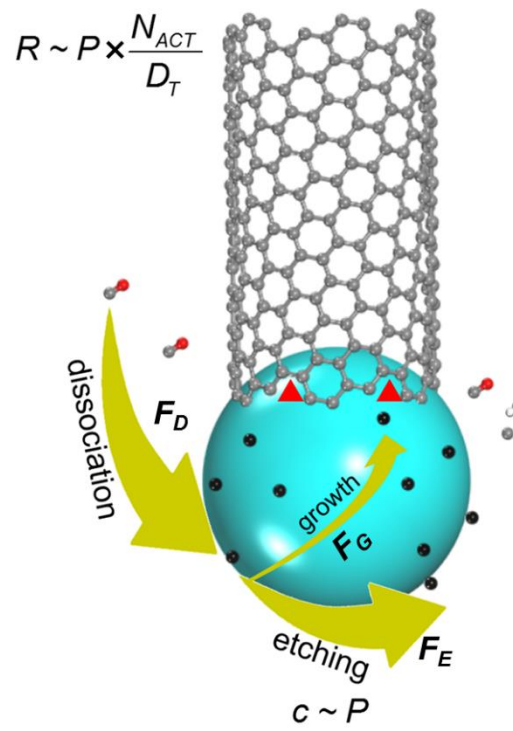

**Fig. S1. Model of SWCNT growth following a screw dislocation theory.** Schematic illustration of SWCNT growth in the presence of efficient etching agents. The SWCNT growth follows a screw dislocation theory.

a) #2:

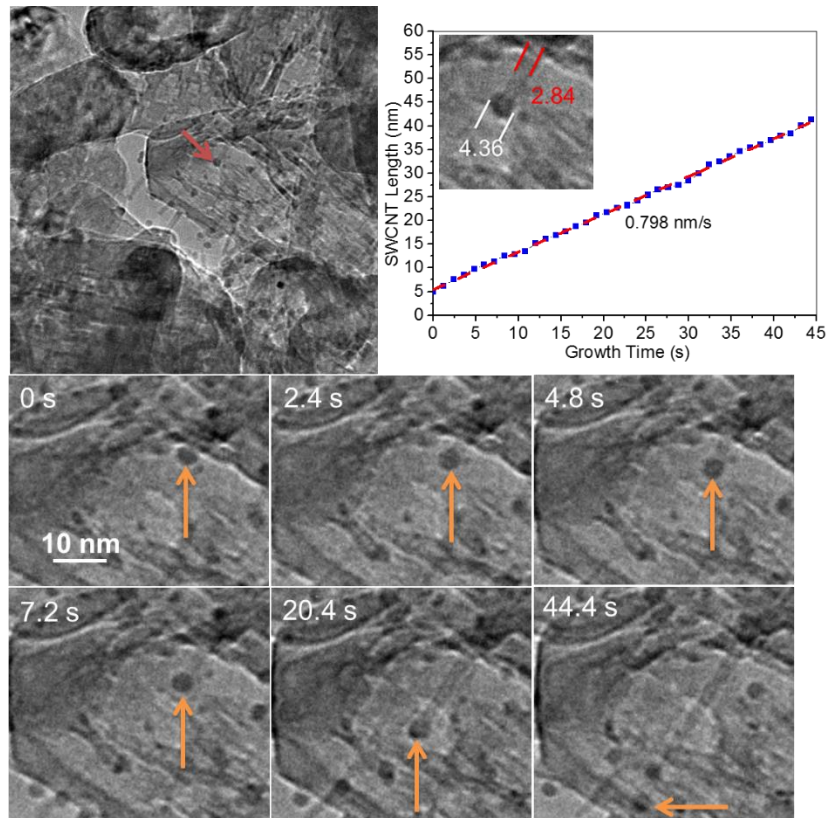

b) #3:

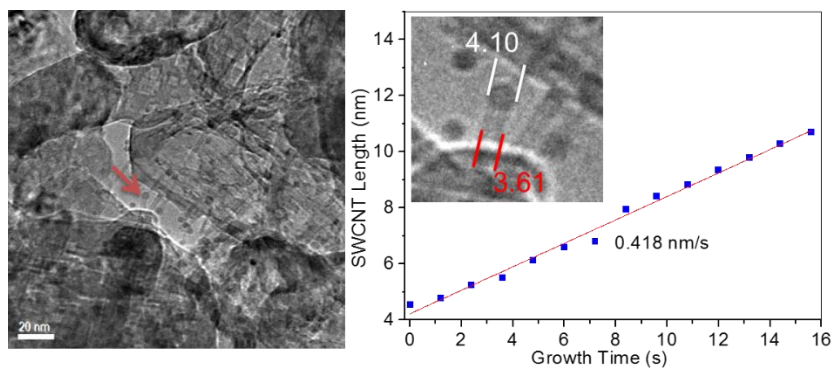

c) #4:

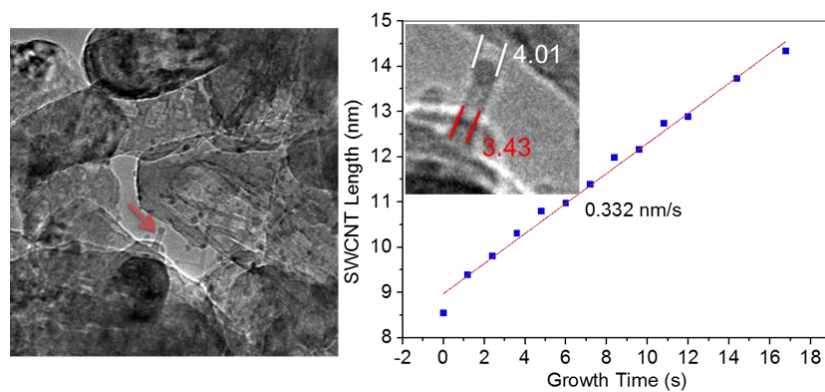

d) #5:

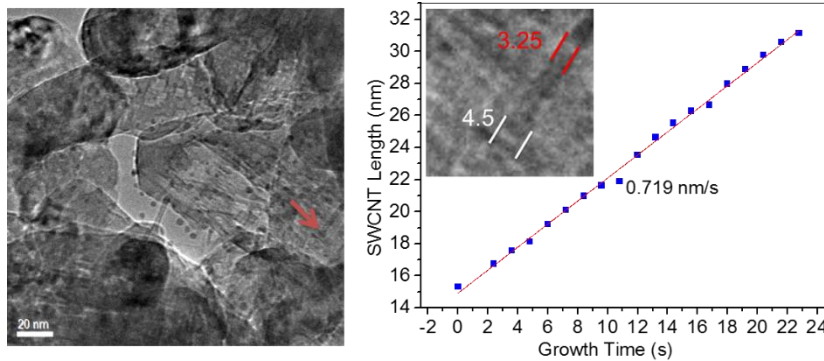

e) #6:

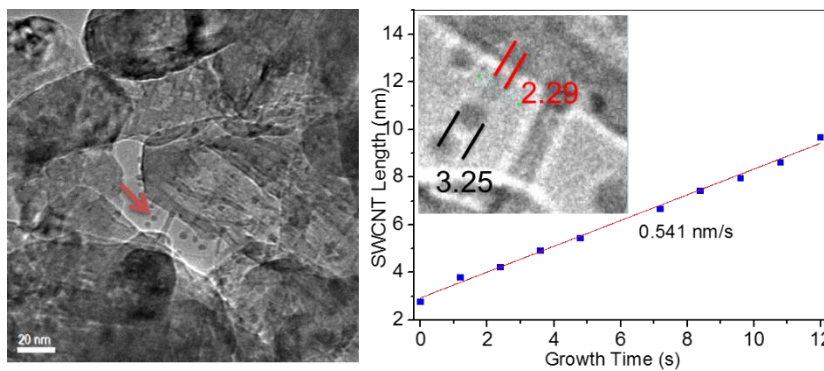

f) #7:

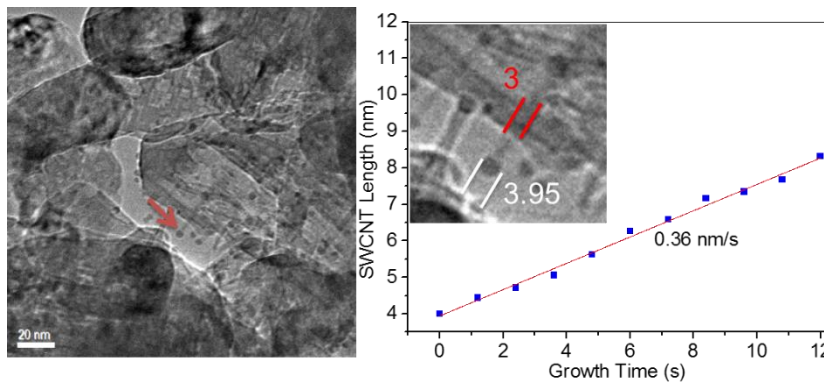

g) #8:

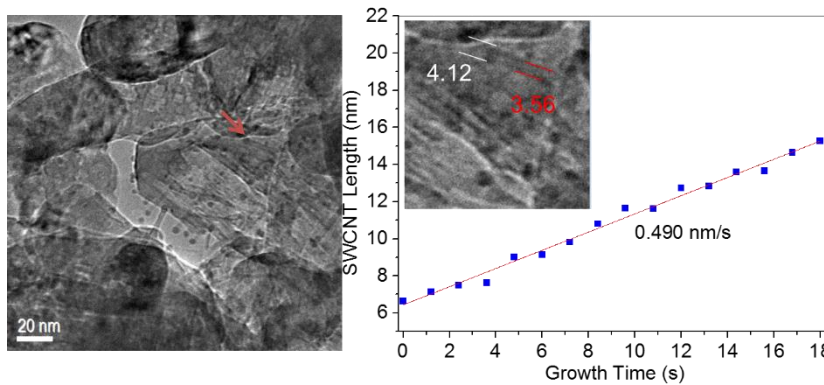

h) #9:

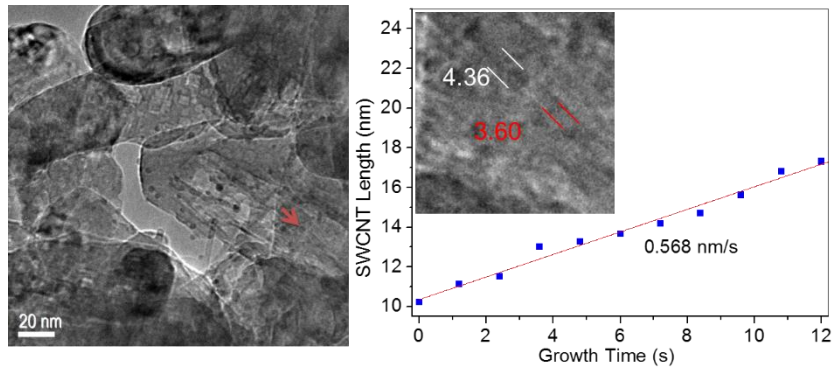

i) #10:

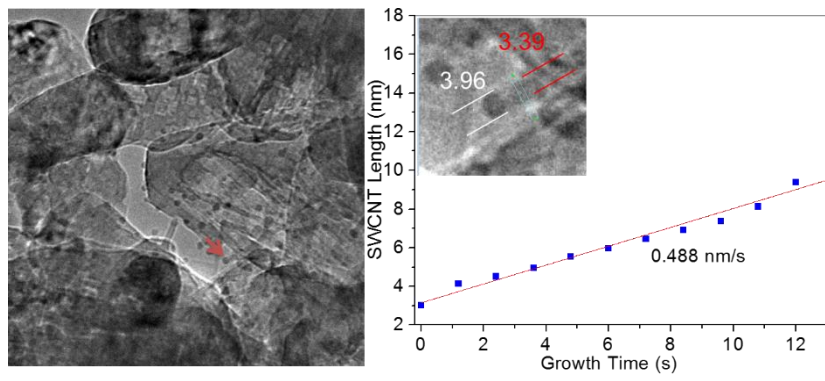

j) #11:

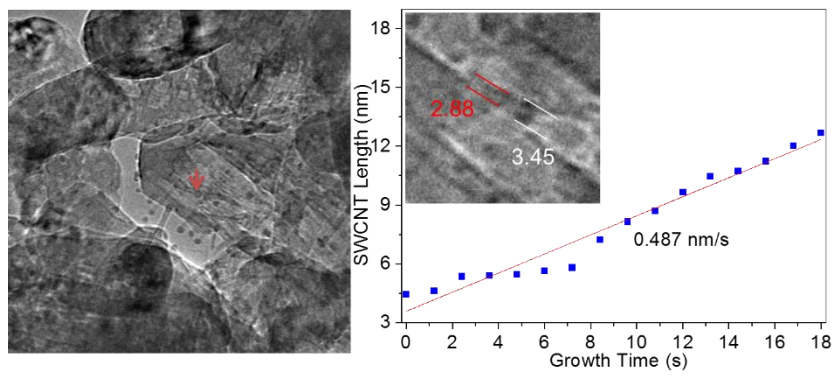

k) #12:

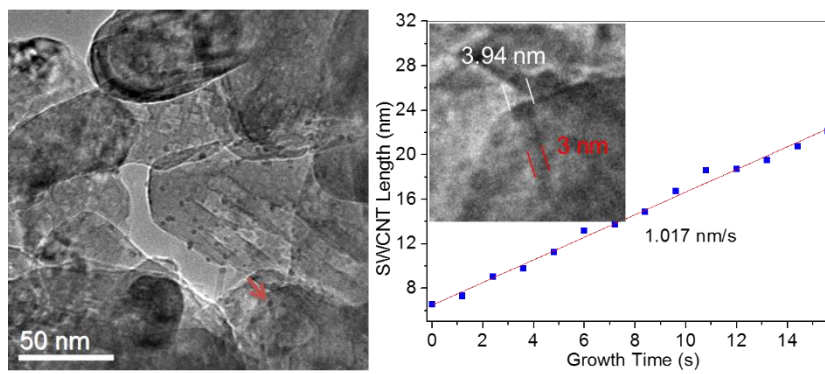

l) #13:

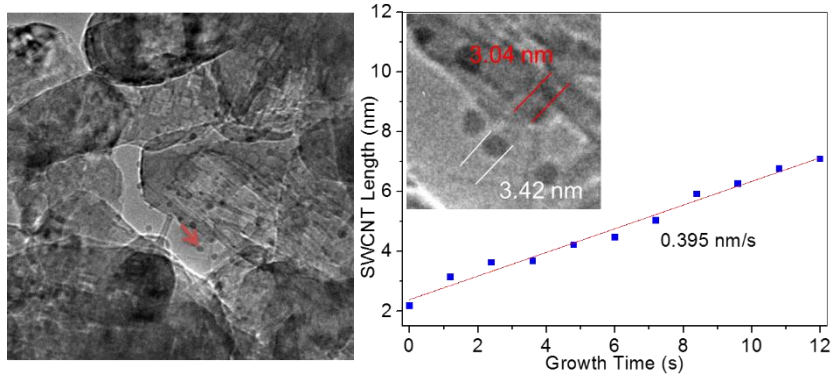

m) #14:

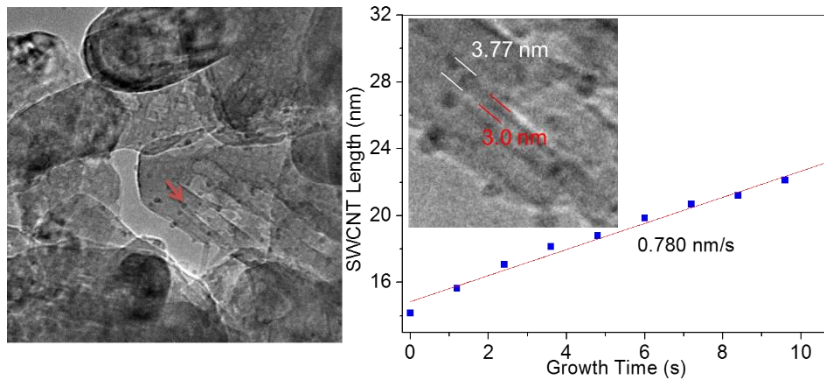

n) #15:

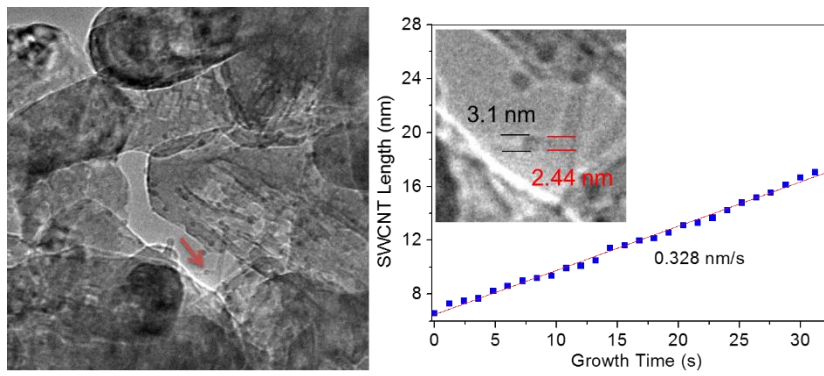

o) #16:

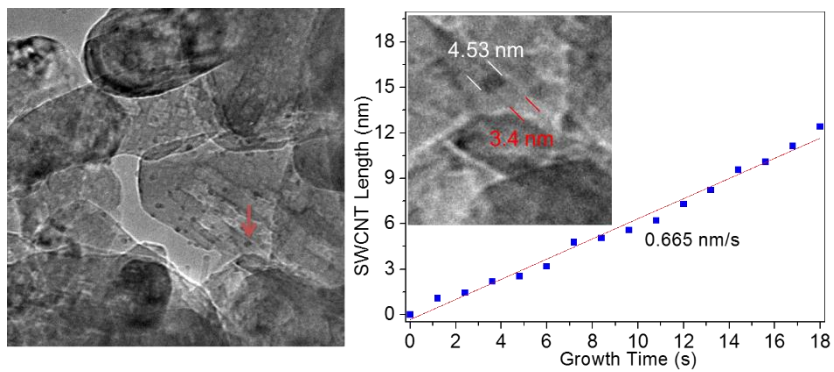

**Fig. S2. Investigated SWCNTs (marked with arrows) and calculated growth rates.** SWCNT TEM images and growth rates derived by fitting the plots of SWCNT lengths against growth time. All the units for measured diameter are nm.

**Table S1. Growth rates and corresponding parameters of SWCNTs and catalysts for 16 different SWCNTs.**

| SWCNT Sample | SWCNT diameter ( $D_T$ , nm) | Catalyst particle size ( $D_C$ , nm) | Exposed catalyst surface area ( $A$ , nm <sup>2</sup> ) | SWCNT growth rate ( $R_T$ , nm/s) |
|--------------|------------------------------|--------------------------------------|---------------------------------------------------------|-----------------------------------|
| #1           | 3.57                         | 4.14                                 | 40.56                                                   | 0.302                             |
| #2           | 2.84                         | 4.36                                 | 52.52                                                   | 0.798                             |
| #3           | 3.61                         | 4.1                                  | 38.92                                                   | 0.418                             |
| #4           | 3.43                         | 4.01                                 | 38.34                                                   | 0.332                             |
| #5           | 3.25                         | 4.5                                  | 53.81                                                   | 0.719                             |
| #6           | 2.29                         | 3.25                                 | 28.36                                                   | 0.541                             |
| #7           | 2.89                         | 3.75                                 | 40.45                                                   | 0.36                              |
| #8           | 3.56                         | 4.12                                 | 40.08                                                   | 0.49                              |
| #9           | 3.6                          | 4.36                                 | 46.71                                                   | 0.568                             |
| #10          | 3.39                         | 3.96                                 | 37.36                                                   | 0.488                             |
| #11          | 2.88                         | 3.45                                 | 28.99                                                   | 0.487                             |
| #12          | 3.04                         | 3.42                                 | 26.79                                                   | 0.395                             |
| #13          | 2.83                         | 3.77                                 | 37.08                                                   | 0.78                              |
| #14          | 2.44                         | 3.1                                  | 24.41                                                   | 0.328                             |
| #15          | 3.4                          | 4.53                                 | 53.53                                                   | 0.665                             |
| #16          | 3                            | 4.34                                 | 50.97                                                   | 0.559                             |

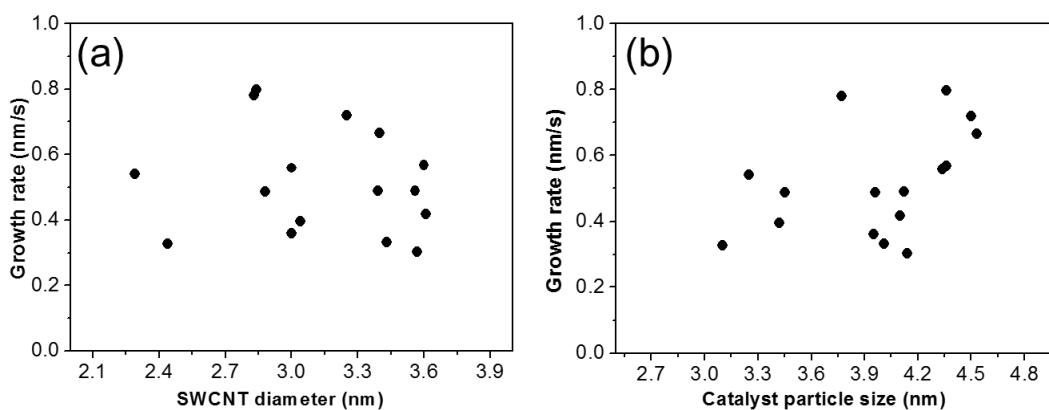

**Fig. S3. SWCNT growth rate plots against tube diameter and catalyst size.** SWCNT growth rate is plotted as a function of (a) SWCNT diameter; (b) catalyst particle size.

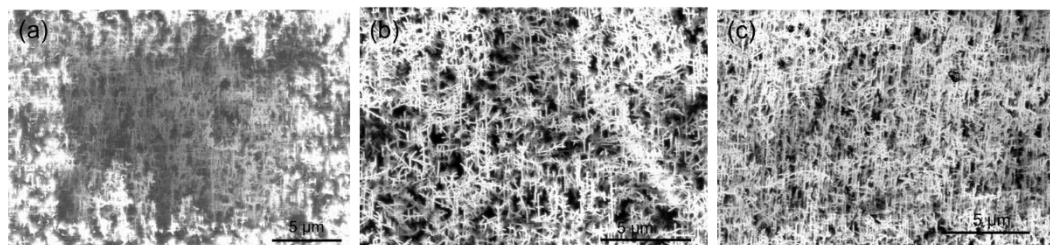

**Fig. S4. SEM images of carbon nanotubes grown on quartz-supported Co catalyst.** Scanning electron microscopy images of carbon nanotubes grown on quartz supported Co catalysts by CVD in 300 sccm Ar using different flow rate of CO: (a) 30 sccm; (b) 40 sccm; (c) 50 sccm.

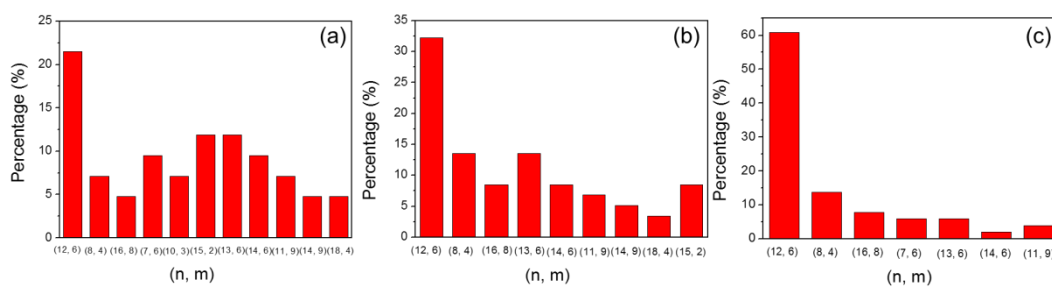

**Fig. S5. Chirality distribution histograms of SWCNTs grown on Co particles with different CO fluxes.** Chirality distribution histograms of SWCNTs grown on Co particles with different CO flux. (a) 30 sccm; (b) 40 sccm; (c) 50 sccm.



**Table S2.  $(n, m)$  populations of SWCNTs grown on Co catalyst using different flow rates of CO.**

| <b>Chirality</b><br>$(n, m)$ | <b>Abundance</b> |            |            |
|------------------------------|------------------|------------|------------|
|                              | 30 sccm CO       | 40 sccm CO | 50 sccm CO |
| (12, 6)                      | 21.5%            | 32.2%      | 60.8%      |
| (8, 4)                       | 7.1%             | 13.5%      | 13.7%      |
| (16, 8)                      | 4.8%             | 8.5%       | 7.8%       |
| (7, 6)                       | 9.5%             | 0          | 5.9%       |
| (10, 3)                      | 7.1%             | 0          | 0          |
| (15, 2)                      | 11.9%            | 8.5%       | 0          |
| (13, 6)                      | 11.9%            | 13.5%      | 5.9%       |
| (14, 6)                      | 9.5%             | 8.5%       | 2.0%       |
| (11, 9)                      | 7.1%             | 6.8%       | 3.9%       |
| (14, 9)                      | 4.8%             | 5.1%       | 0          |
| (18, 4)                      | 4.8%             | 3.4%       | 0          |

**Table S3. Chirality distribution of SWCNTs grown on Mo<sub>2</sub>C using different ratios of ethanol and H<sub>2</sub>.** The abundance of different SWCNT species is determined by Raman spectroscopy.

| Chirality | Abundance |            |            |             |             |
|-----------|-----------|------------|------------|-------------|-------------|
|           | E:H=100:0 | E:H=100:10 | E:H=100:50 | E:H=100:100 | E:H=100:200 |
| (12,6)    | 87%       | 68.6%      | 37.7%      | 24.5%       | 17.1%       |
| (12,8)    | 4.8%      | 3.8%       | 13.0%      | 11.8%       | 13.0%       |
| (16,8)    | 3.3%      | 5.1%       | 7.2%       | 12.7%       | 10.3%       |
| (8,4)     | 3.3%      | 3.8%       | 5.1%       | 3.6%        | 2.1%        |
| (10,5)    | 1.6%      | 1.9%       | 0.7%       | 1.8%        | 0.7%        |
| (18,6)    | 0         | 1.9%       | 5.1%       | 10.9%       | 11.0%       |
| (12,4)    | 0         | 6.4%       | 10.1%      | 9.1%        | 8.2%        |
| (9,8)     | 0         | 1.9%       | 4.3%       | 5.5%        | 4.8%        |
| (10,8)    | 0         | 3.2%       | 0.7%       | 0.9%        | 4.1%        |
| (11,8)    | 0         | 1.9%       | 2.2%       | 1.8%        | 6.8%        |
| (15,2)    | 0         | 1.3%       | 7.2%       | 7.3%        | 10.3%       |
| (6,4)     | 0         | 0          | 0.7%       | 0.9%        | 0.7%        |
| (9,7)     | 0         | 0          | 5.8%       | 1.8%        | 2.1%        |
| (8,1)     | 0         | 0          | 0          | 0.9%        | 2.1%        |
| (14,4)    | 0         | 0          | 0          | 6.4%        | 6.8%        |

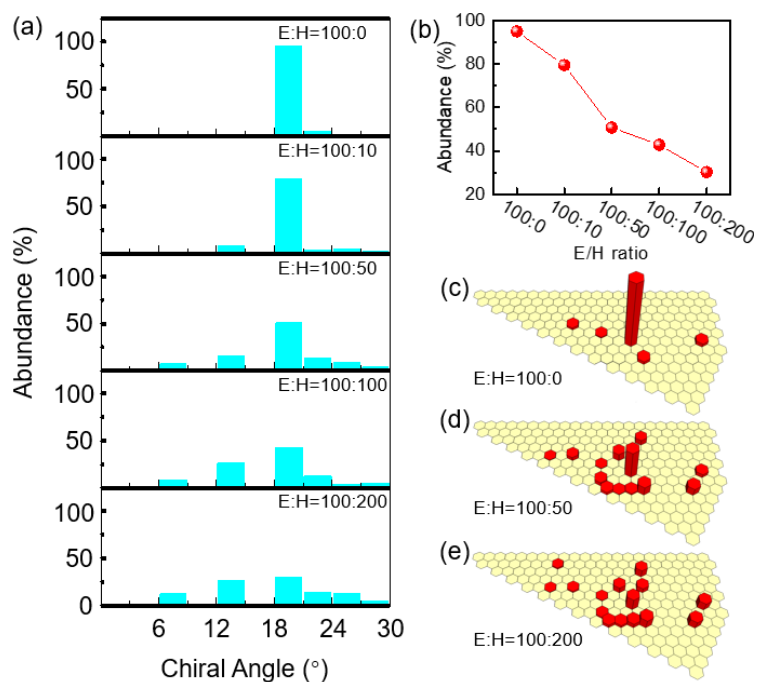

**Fig. S6. Chirality evolution and distribution of SWCNTs grown on Mo<sub>2</sub>C.** (a) the chiral angle distributions of SWCNTs grown from Mo<sub>2</sub>C catalyst particles using a mixture of ethanol and H<sub>2</sub> with different E:H ratio at 850 °C. (b) the abundance of (2n, n) SWCNTs and the chirality distributions of SWCNTs grown with ethanol to H<sub>2</sub> (E:H) ratios of (c)100:0, (d) 100:50 and (e)100:200. Note that the (2n, n) SWCNTs include the (12,6) and others, such as (8,4) and (10,5).
